# Supplementary material for: Synthesis, Characterization, and Antibacterial Activity of Diethyl 1-((4-Methyl-2-phenyl-4,5-dihydrooxazol-4-yl)methyl)-1H-1,2,3-triazole-4,5-dicarboxylate
Source: Hindawi journal article supplement (doi:10.1155/2017/4238360), 2017-01-01

# Supplementary Files

## Supplementary spectrum 1. <sup>1</sup>H spectrum (in CDCl<sub>3</sub>) of compound 2.

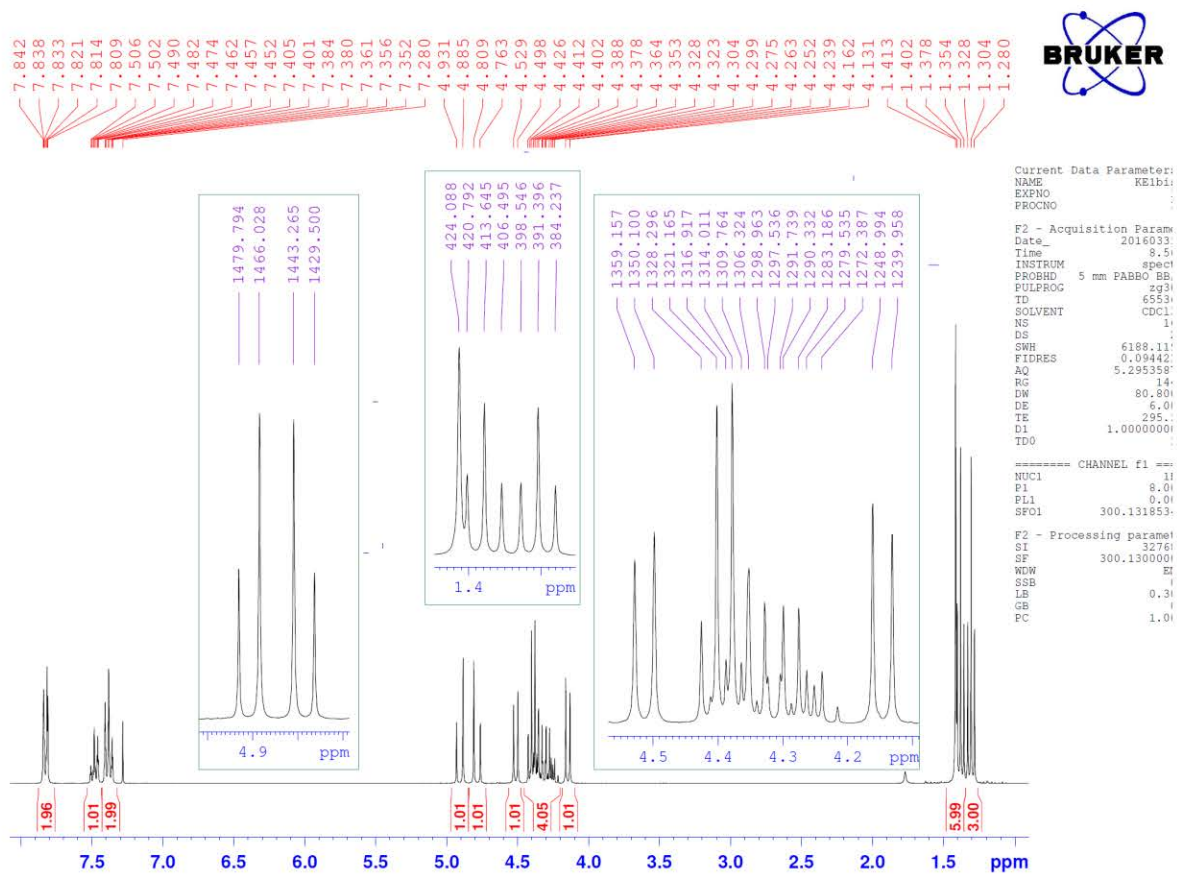

# Supplementary spectrum 2. <sup>13</sup>C spectrum (in CDCl<sub>3</sub>) of compound 2.

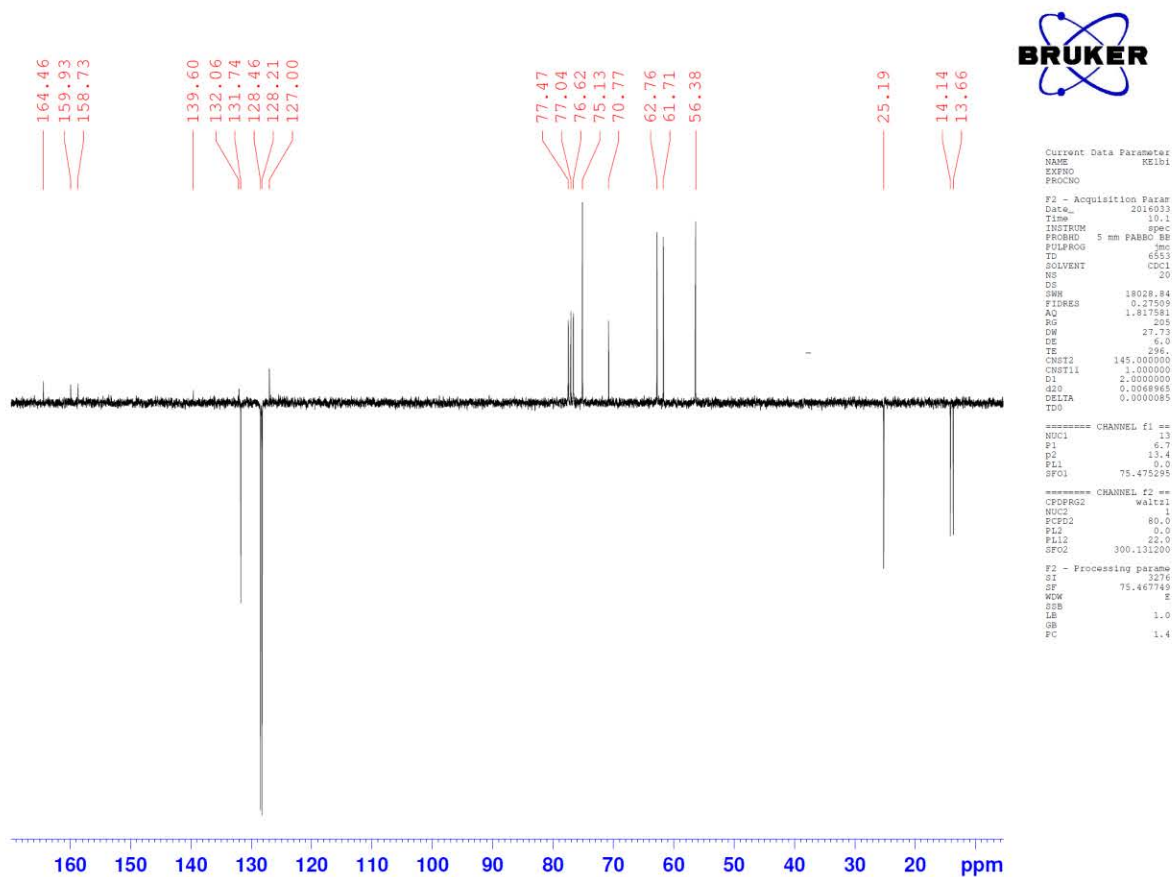

Supplementary spectrum 3. Homonuclear  $^1\text{H}$ - $^1\text{H}$  2D spectrum (in  $\text{CDCl}_3$ ) of compound 2.

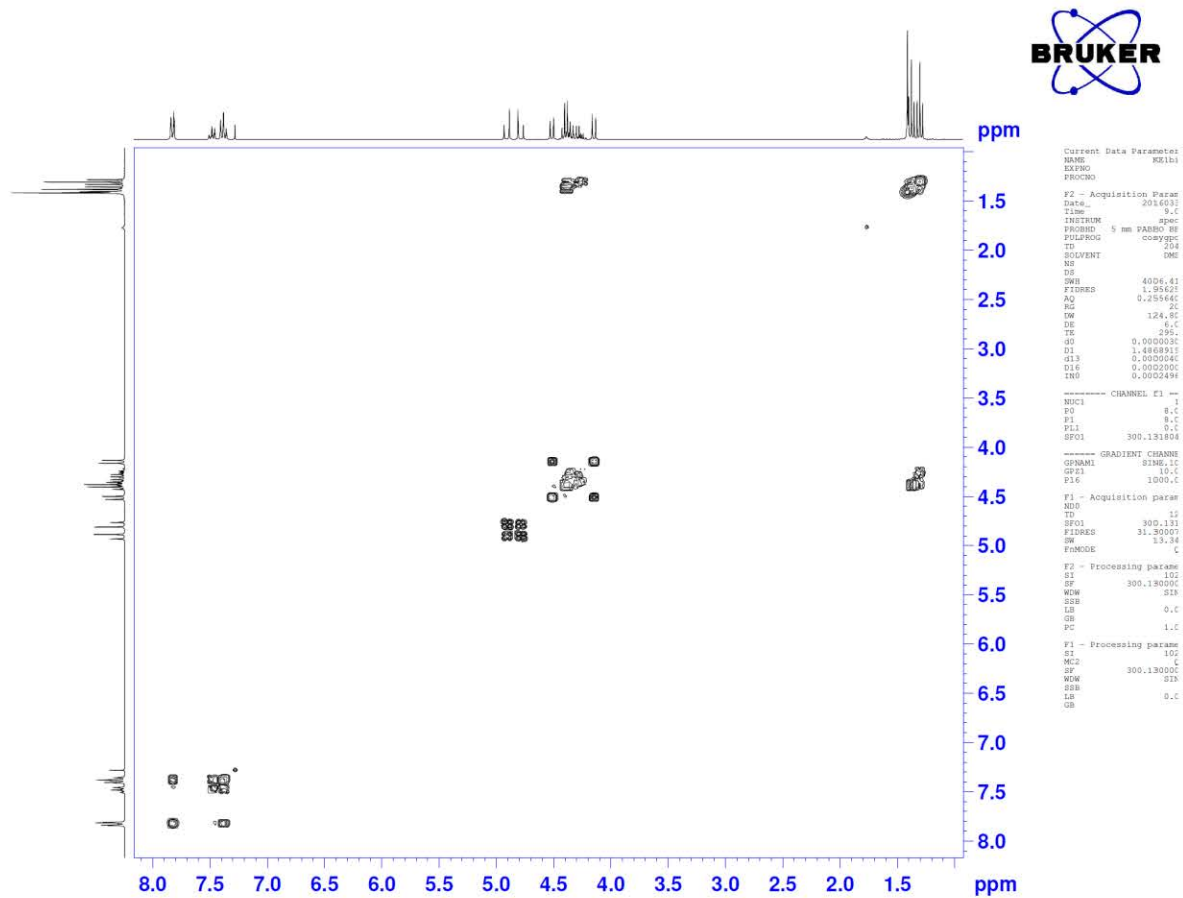

Supplementary spectrum 4. Heteronuclear  $^1\text{H}$ - $^{13}\text{C}$  2D spectrum (in  $\text{CDCl}_3$ ) of compound 2.

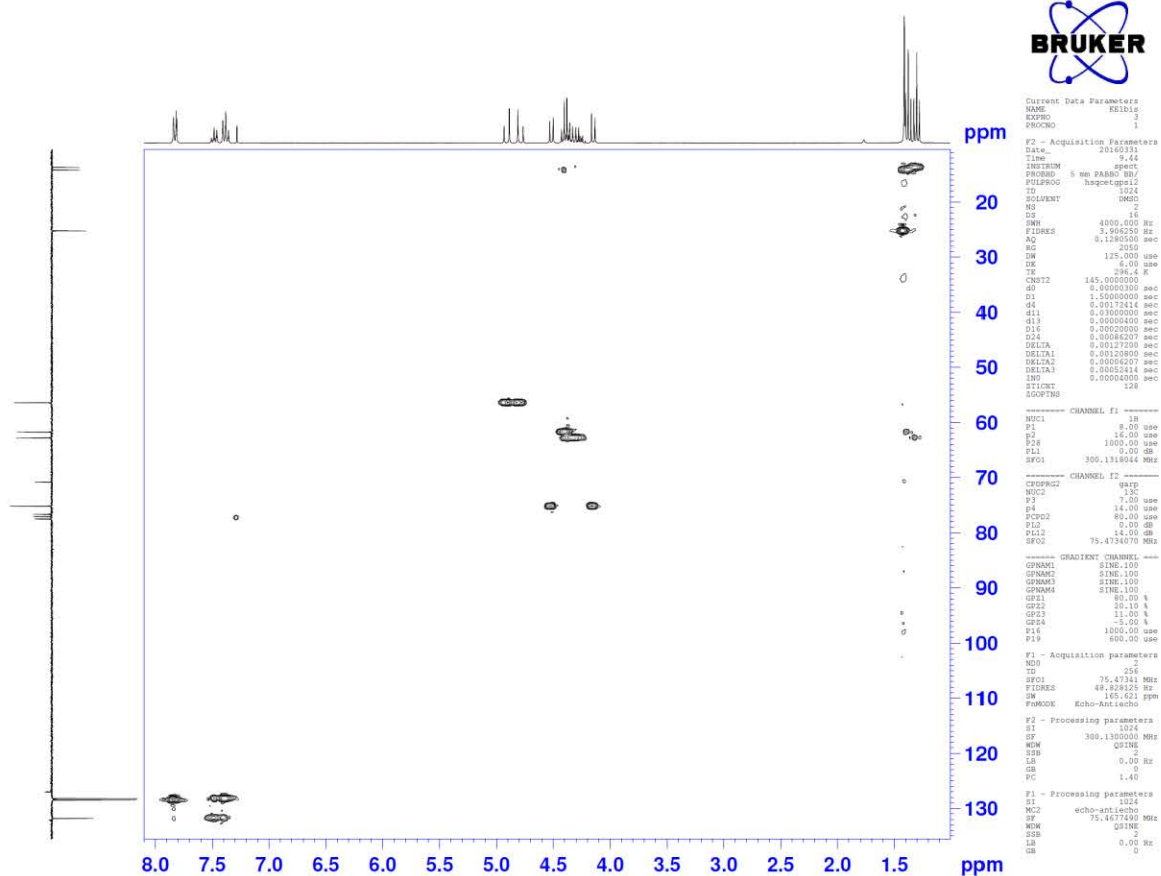

Supplementary spectrum 5. Mass spectrum of compound 2.

Spectre de masse SB\_5

5 #4 RT: 0.08 AV: 1 NL: 1.04E8  
T: + c ESI Full ms [ 150.00-2000.00]

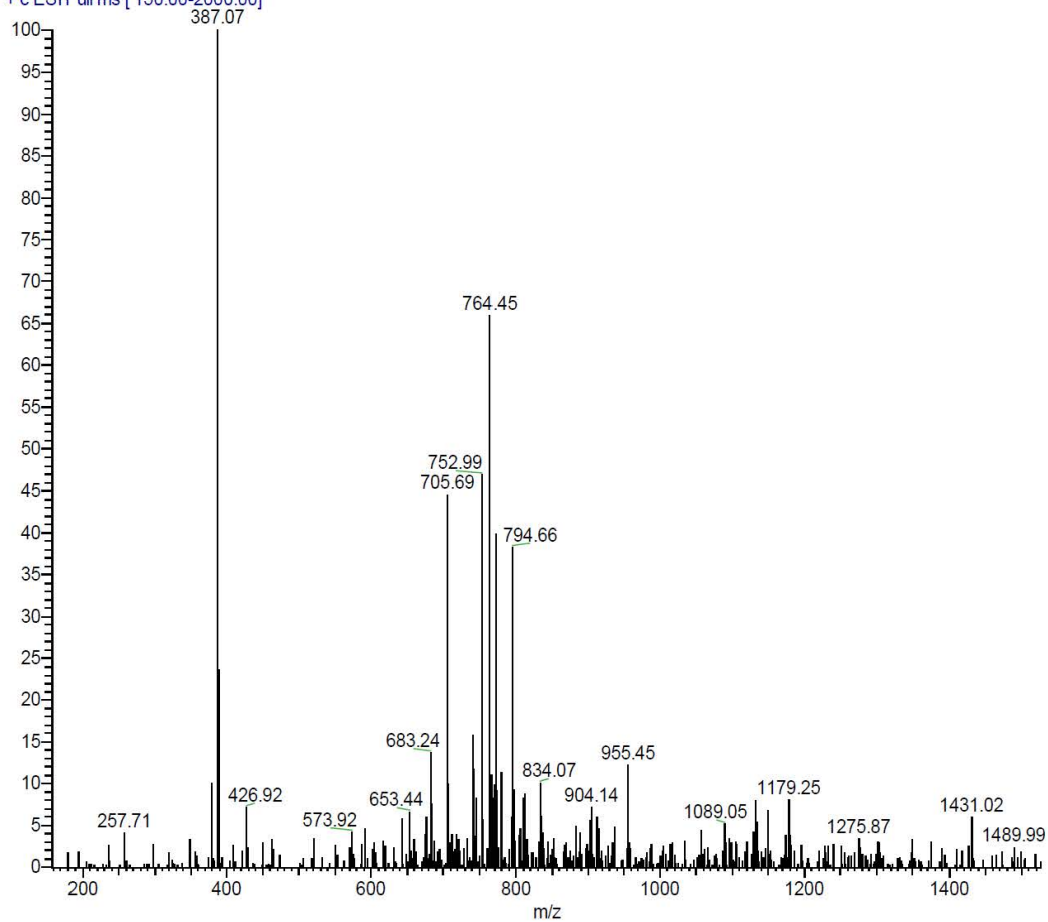

Supplement: f1 [file 4238360.f1.pdf]
